# Supplementary material for: Evolutionary Origin of the Mitochondrial Cholesterol Transport Machinery Reveals a Universal Mechanism of Steroid Hormone Biosynthesis in Animals
Source: PubMed Central journal article supplement (PMC3790746; doi:10.1371/journal.pone.0076701), 2013-10-04
Supplement: pone.0076701.s006.pdf [file pone.0076701.s006.pdf]

**Table S1.****Table S1. Accession numbers of the genes used as queries in this study**

| Abbreviation <sup>a</sup> | Species             | Genbank Accession No. |
|---------------------------|---------------------|-----------------------|
| TSPO                      | <i>Homo sapiens</i> | NP_000705             |
|                           | <i>Mus musculus</i> | NP_033905             |
| STAR/STARD1               | <i>Homo sapiens</i> | NP_000340             |
|                           | <i>Mus musculus</i> | NP_035615             |
| ACBD3/PAP7                | <i>Homo sapiens</i> | NP_073572             |
|                           | <i>Mus musculus</i> | NP_573488             |
| CYP11A1                   | <i>Homo sapiens</i> | NP_000772             |
|                           | <i>Mus musculus</i> | NP_062753             |
| ACBD1/DBI                 | <i>Homo sapiens</i> | NP_001033088          |
|                           | <i>Mus musculus</i> | NP_065438             |
| PRKAR1A                   | <i>Homo sapiens</i> | NP_002725             |
|                           | <i>Mus musculus</i> | NP_068680             |
| ATAD3                     | <i>Homo sapiens</i> | NP_001164006          |
|                           | <i>Mus musculus</i> | NP_849534             |
| MAPK3/ERK1/2              | <i>Homo sapiens</i> | NP_002740             |
|                           | <i>Mus musculus</i> | NP_036082             |
| ACSL4                     | <i>Homo sapiens</i> | NP_075266             |
|                           | <i>Mus musculus</i> | NP_997508             |
| ACOT2/3                   | <i>Homo sapiens</i> | NP_006812             |
|                           | <i>Mus musculus</i> | NP_598949             |
| VDAC1                     | <i>Homo sapiens</i> | 2K4T                  |
|                           | <i>Mus musculus</i> | 3EMN                  |
| ANT1                      | <i>Homo sapiens</i> | NP_001142             |
|                           | <i>Mus musculus</i> | NP_031476             |

**a**, TSPO, translocator protein (18kDa), or benzodiazapine receptor (peripheral; BZRP or PBR); STAR/STARD1, steroidogenic acute regulatory protein or START domain containing 1; ACBD3/PAP7, acyl-CoA binding domain containing 3 or PBR- and PKA-associated protein 7; CYP11A1, cytochrome P450, family 11, subfamily A, polypeptide 1; ACBD1/DBI, acyl-CoA binding domain containing 1 or diazepam binding inhibitor (GABA receptor modulator, acyl-CoA binding protein); PRKAR1A, protein kinase, cAMP-dependent, regulatory, type I, alpha; ATAD3, ATPase family, AAA domain containing 3A; MAPK3/ERK1/2, mitogen-activated protein kinase 3 or extracellular signal-regulated kinase ½; ACSL4, acyl-CoA synthetase long-chain family member 4; ACOT2/3, acyl-CoA thioesterase 2/3; VDAC1, voltage-dependent anion channel 1; ANT1, adenine nucleotide translocator 1 or solute carrier family 25 (mitochondrial carrier; adenine nucleotide translocator), member 4.
